# Supplementary material for: Functionalization of Cathode–Electrolyte Interface with Ionic Liquids for High-Performance Quasi-Solid-State Lithium–Sulfur Batteries: A Low-Sulfur Loading Study
Source: MDPI journal article supplement (doi:10.3390/batteries10050155), 2024-04-30
Supplement: s1 [file s1]

# Functionalization of Cathode–Electrolyte Interface with Ionic Liquids for High-Performance Quasi-Solid-State Lithium–Sulfur Batteries: A Low-Sulfur Loading Study

Milinda Kalutara Koralalage <sup>1,†</sup>, Varun Shreyas <sup>2,†</sup>, William R. Arnold <sup>2</sup>, Sharmin Akter <sup>2</sup>, Arjun Thapa <sup>3</sup>, Badri Narayanan <sup>2,3,\*</sup>, Hui Wang <sup>2,3</sup>, Gamini U. Sumanasekera <sup>1,3,\*</sup> and Jacek B. Jasinski <sup>3,\*</sup>

<sup>1</sup> Department of Physics and Astronomy, University of Louisville, Louisville, KY 40292, USA

<sup>2</sup> Department of Mechanical Engineering, University of Louisville, Louisville, KY 40292, USA

<sup>3</sup> Conn Center for Renewable Energy Research, University of Louisville, Louisville, KY 40292, USA

\* Correspondence: badri.narayanan@louisville.edu (B.N.); gamini.sumanasekera@louisville.edu (G.U.S.); jacek.jasinski@louisville.edu (J.B.J.)

† These authors contributed equally to this work.

## 2.6. Battery Assembly

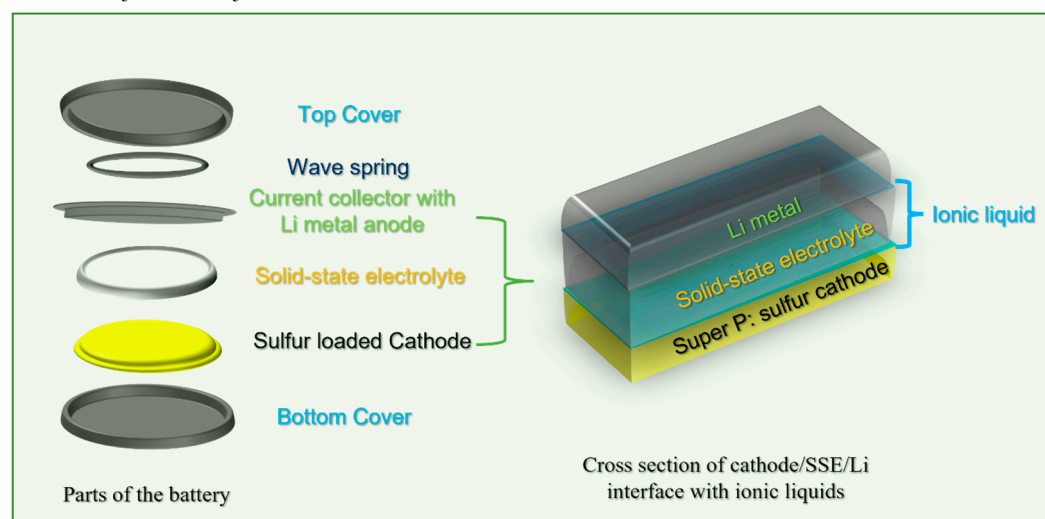

**Figure S1:** Parts of the CR2032 coin cell assembly and cross section of cathode/SSE/Li metal interface with thin layer of ionic liquids.

Figure S1 shows the essential parts of a CR2032 battery used to assemble QSSEB and the cross-sectional view of the QSSEB cathode/SSE/Li metal interface in the presence of ILs at cathode/SSE and Li/SSE interfaces.

### 3.2. Electrochemical Testing

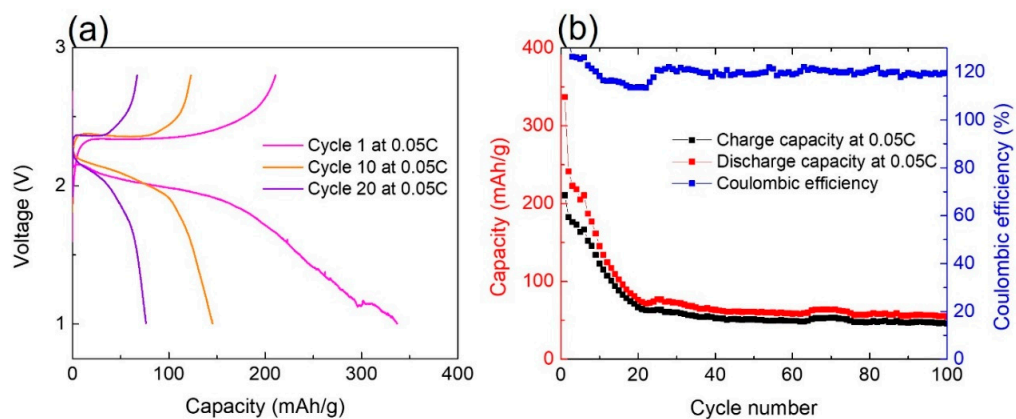

**Figure S2:** Performance of QSSEB with ionic liquid LiTFSI(1M) in PYR.

Figure S2 (a) & (b) show the performance of QSSEB with the ionic liquid LiTFSI (1M) dissolved in PYR at C/20 rate for 100 cycles. Voltage profile is shown during charging and discharging at cycles 1, 10, and 20.

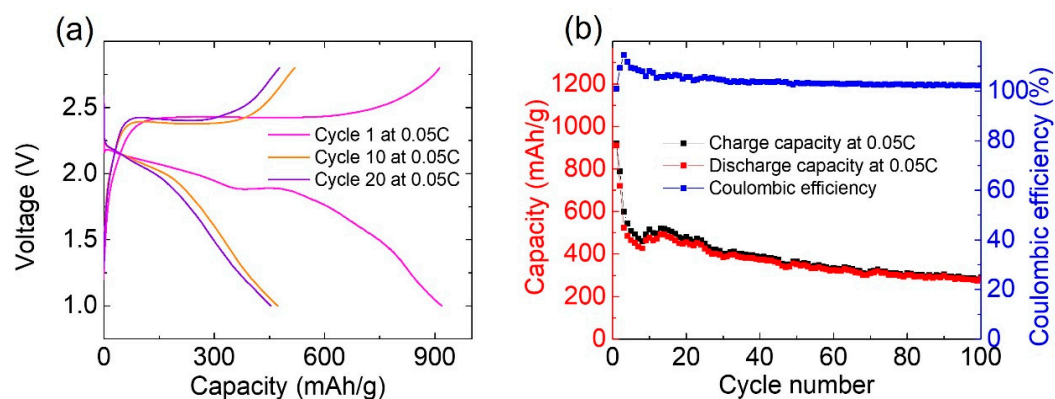

**Figure S3:** Performance of QSSEB with ionic liquid LiTFSI (1M) in PYR:DOL (1:1).

Figure S3 (a) & (b) show the performance of QSSEB with the ionic liquid LiTFSI(1M) dissolved in PYR:DOL(1:1) at C/20 rate for 100 cycles. Voltage profile is shown during charging and discharging at cycles 1, 10, and 20.

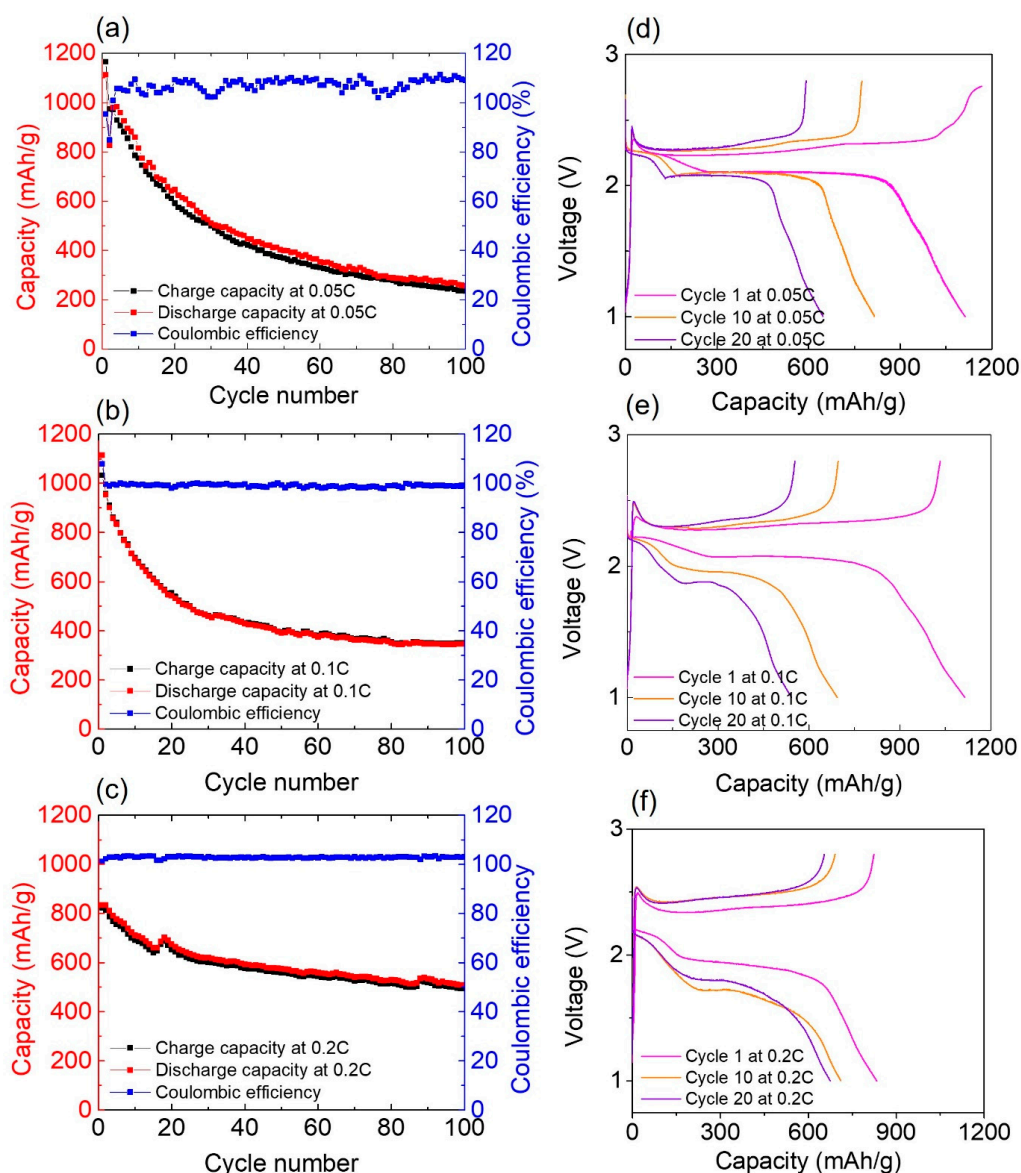

**Figure S4:** C rate dependent cyclic performance at (a) C/20, (b) C/10, (c) C/5 rates and charge-discharge curves at (d) C/20, (e) C/10, (f) C/5 for batteries consist of SP-S/SSE/Li with 40  $\mu$ l of IL LiTFSI(2M) PYR:DOL(1:1).

Figure S4 (a), (b) & (c) show the C rate dependent Capacity (left axis) and coulombic efficiency (right axis) versus cycle number while Figure S3 (d), (e) & (f) show the discharge and charge profiles (at cycles 1, 10 and 20. Batteries charged/discharged at C/20 (Figure S4 (a) & (d)) and C/10 (Figure S4 (b) & (e)) showed initial discharge capacity of  $\sim 1100$  mAh/g. They both seem to retain the capacity  $> 300$  mAh/g after 100 cycles but the battery tested at C/10 showed better coulombic efficiency. However, the battery tested at C/5 showed initial capacity of  $\sim 800$  mAh/g and retained above 60% of initial capacity of  $\sim 500$  mAh/g after 100 cycles with stable coulombic efficiency (Figure S4 (c) & (f)).

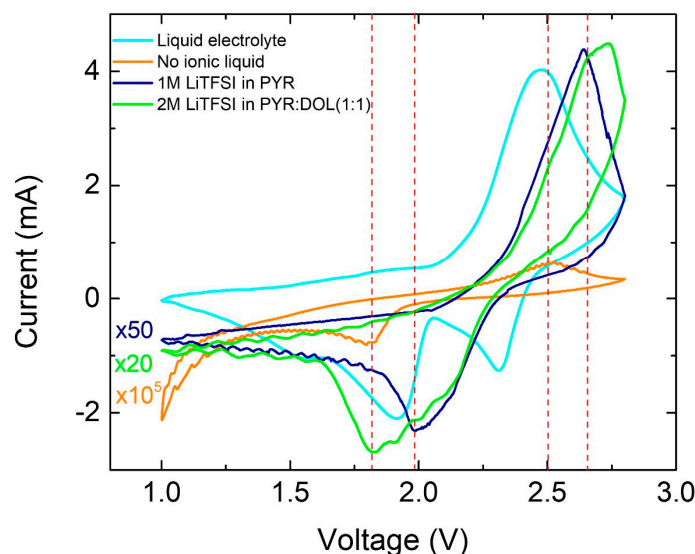

**Figure S5:** Cyclic voltammogram for batteries with and without ionic liquids.

Figure S5 shows the cyclic voltammograms recorded for batteries *consisting of SP-S/SSE/Li* (i) without ionic liquid (orange line), (ii) with IL 1M LiTFSI in PYR (dark blue line) and (iii) with 2M LiTFSI in PYR:DOL(1:1) (Green line) in comparison to liquid electrolyte Li-S battery (light blue line). Third cycle of cyclic voltammograms for each battery is plotted with the magnifications indicated.

### 3.3. XPX Analysis

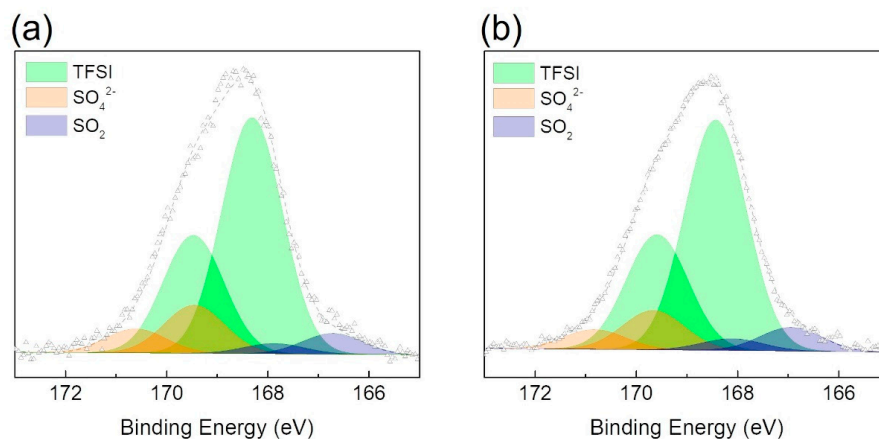

**Figure S6:** XPS S2p high BE peak of the cathode-SSE interface of 2 batteries containing (a) LiTFSI(1M) in PYR and (b) LiTFSI(2M) in PYR:DOL (1:1) after discharge of 100 cycles.

Figure S6 shows the XPS S2p high BE peak of the cathode-SSE interface of 2 batteries containing (a) LiTFSI (1 M) in PYR and (b) LiTFSI (2 M) in PYR:DOL(1:1) after 100 cycle discharge. Both spectra could be fitted with three peaks with each peak consisting, both S2p<sub>1/2</sub> and S2p<sub>3/2</sub> components due to spin-orbit splitting (energy spacing,  $\Delta=1.16\text{eV}$ , intensity ratio=0.511). Both samples show dominant peaks corresponding to TFSI anion from LiTFSI and PYR14-TFSI. Peaks corresponding to SO<sub>2</sub> were detected presumably due to the decomposition of TFSI anions in both LiTFSI and PYR14-TFSI. There are additional peaks

related to sulfates ( $\text{SO}_4^{2-}$ ) presumably due to the reaction of sulfides with any residual oxygen.

### 3.4. AIMD Simulation Results

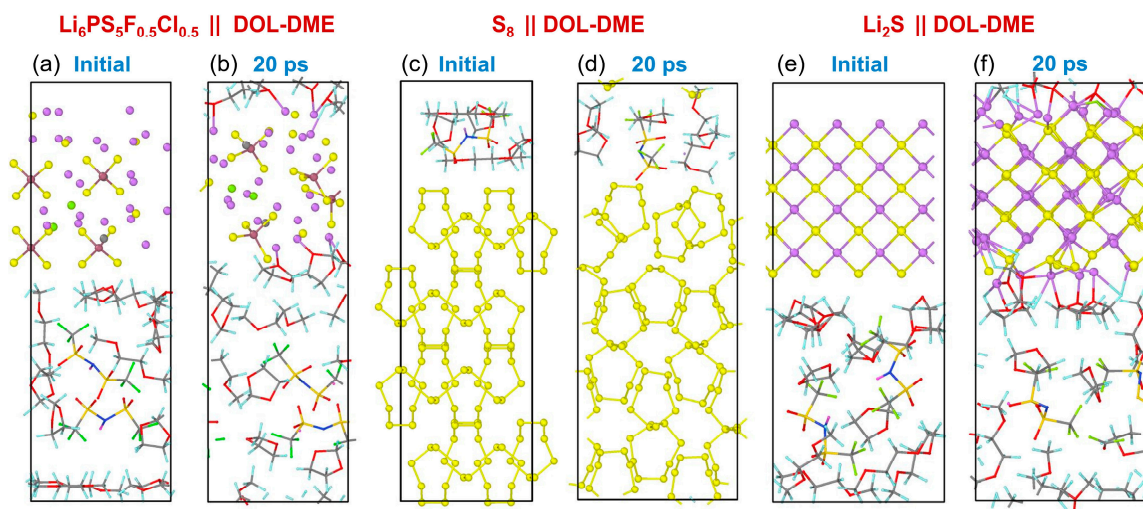

**Figure S7:** Structural evolution of DOL:DME (1:1) interface with (a)  $\text{Li}_6\text{PS}_5\text{F}_{0.5}\text{Cl}_{0.5}$ , (b)  $\text{S}_8$ , and (c)  $\text{Li}_2\text{S}$  obtained from ab initio molecular dynamics simulations under ambient conditions.

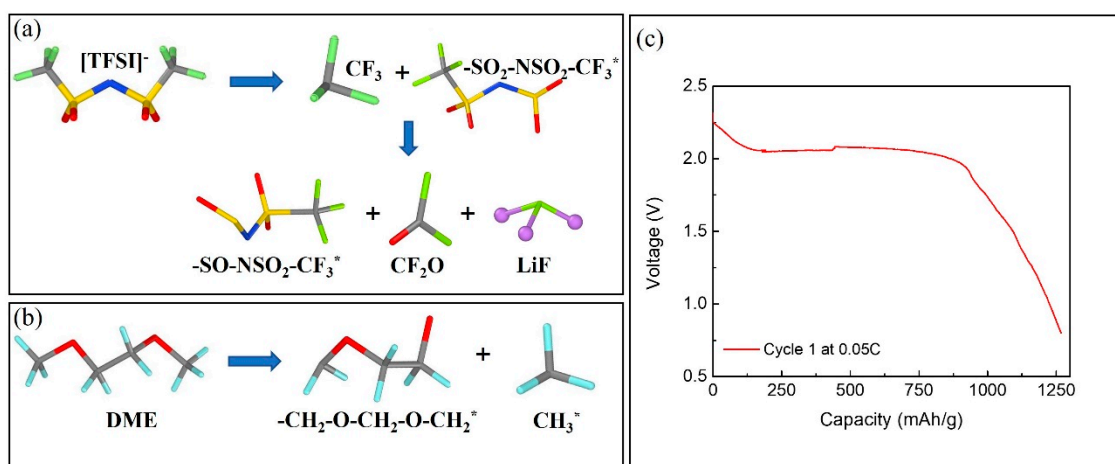

**Figure S8:** The decomposition sequence of (a)  $[\text{TFSI}]^-$  and (b) DME molecules for DOL:DME (1:1) interface with  $\text{Li}_2\text{S}$  obtained from ab initio molecular dynamics simulations under ambient conditions (\*represents the complexes), and (c) discharge curve of DOL:DME (1:1) IL based battery which did not charge back.

Figure S8 shows the decomposition sequence of (a)  $[\text{TFSI}]^-$  and (b) DME molecules for DOL:DME (1:1) interface with  $\text{Li}_2\text{S}$  obtained from AIMD simulations under ambient conditions (\*represents the complexes), and (c) discharge curve of DOL:DME (1:1) IL based battery which did not charge back.
